# Supplementary material
Source: PubMed Central journal article supplement (PMC8102379)
Supplement: NIHMS1677836-supplement-1.pdf [file NIHMS1677836-supplement-1.pdf]

Figure S1

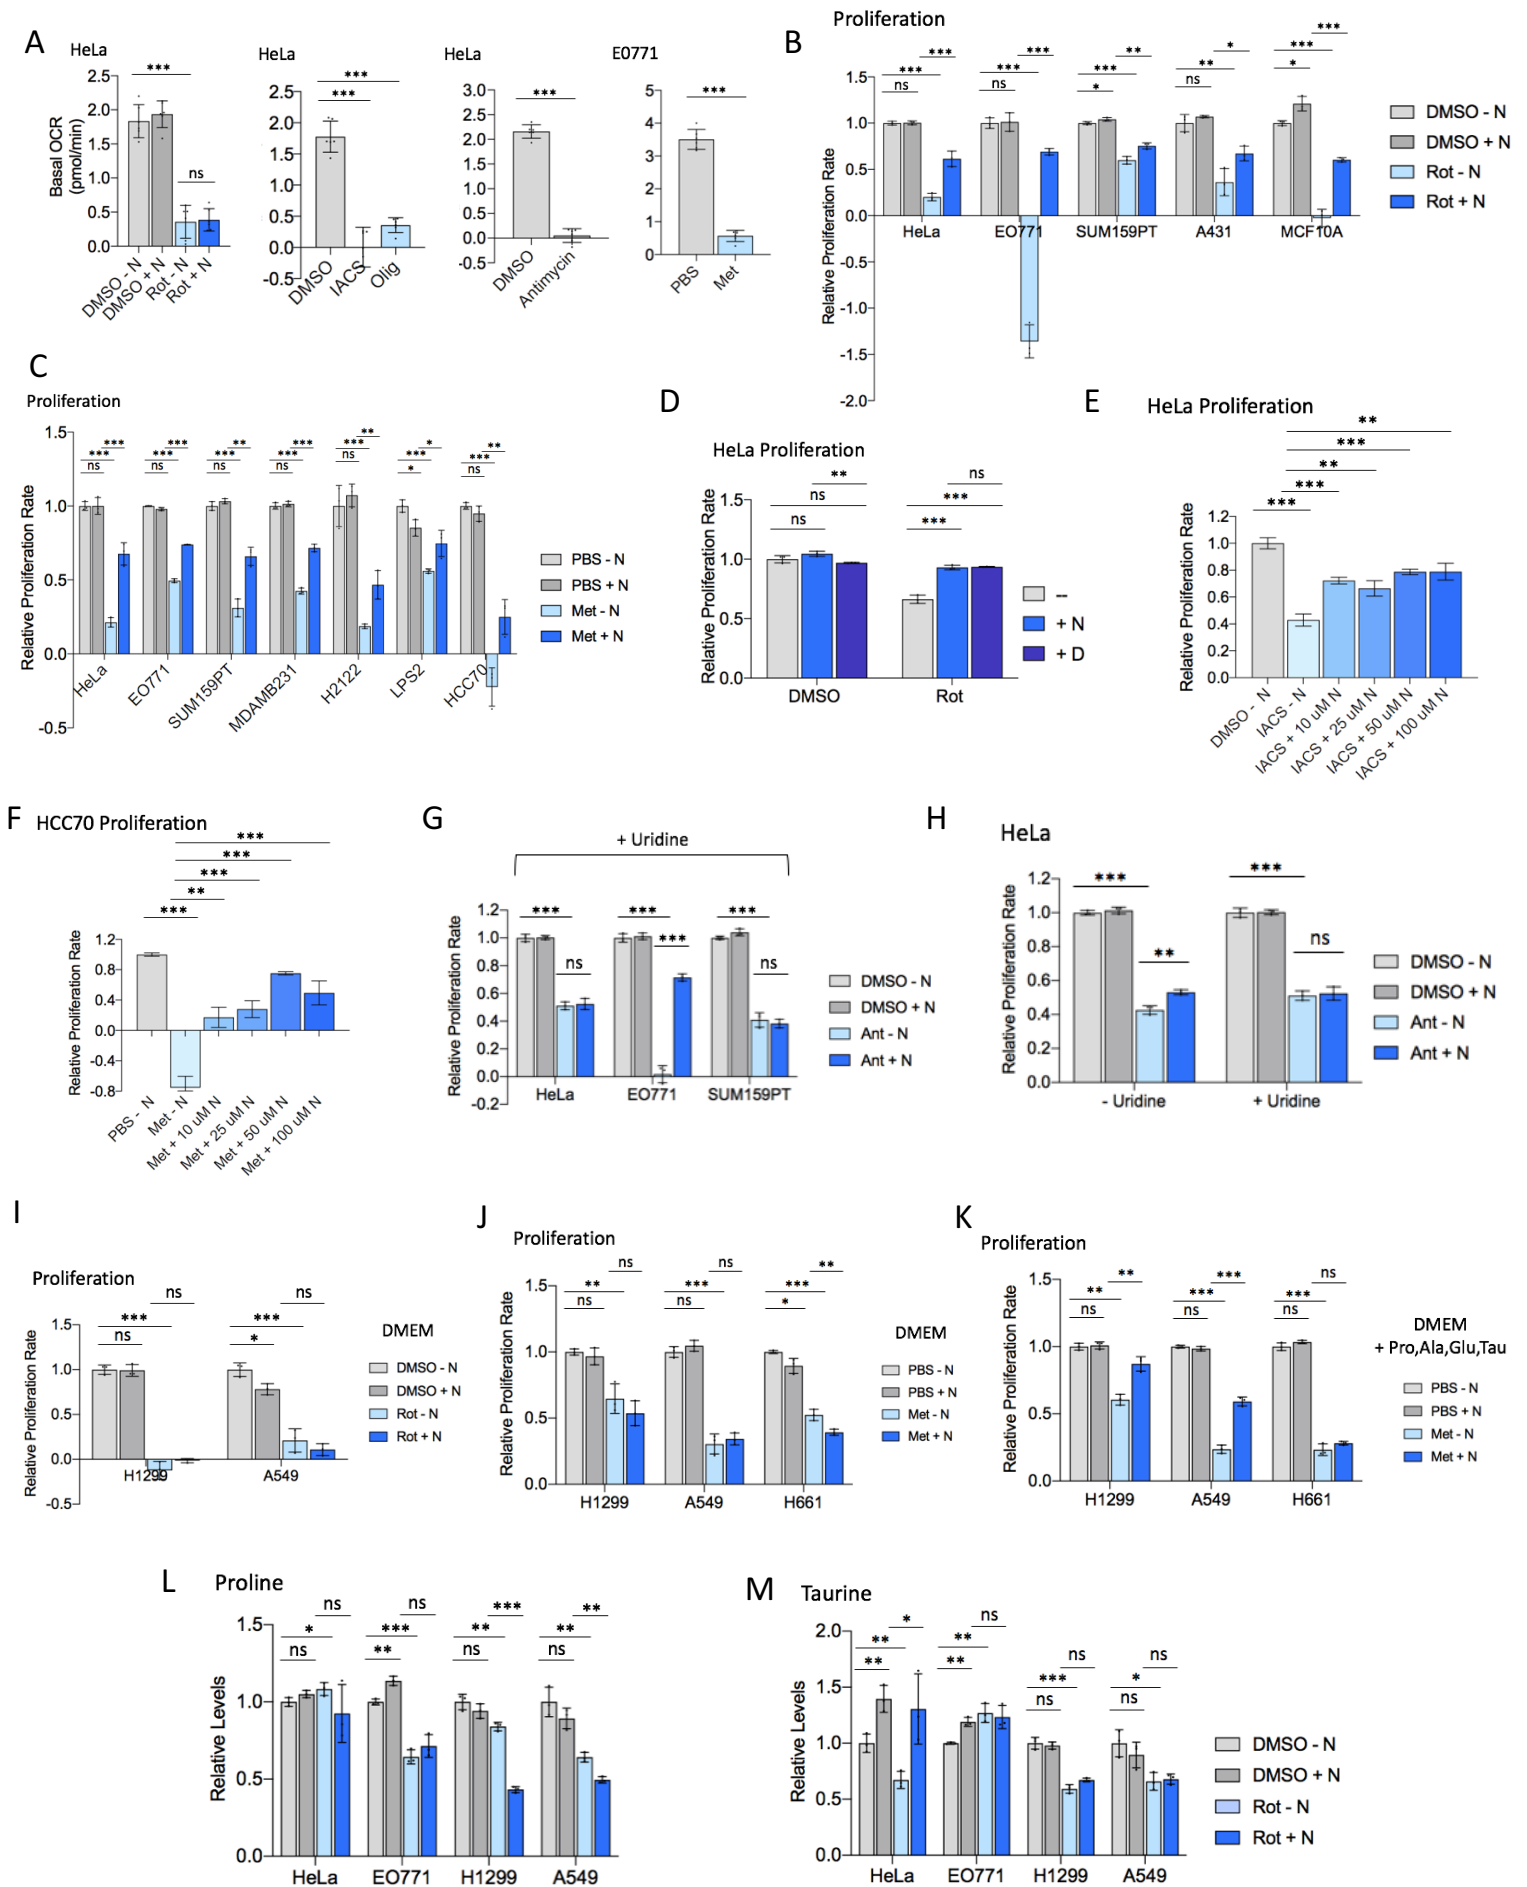

**Figure S1. Asparagine enables proliferation in the context of ETC inhibition. Related to Figure 1.**

(A) Basal oxygen consumption rates (OCR) for the indicated cell line in the presence or absence of 0.1 mM exogenous asparagine and the indicated ETC inhibitor at concentrations listed in Supplementary Table I.

(B) Relative proliferation rate of indicated cell lines with rotenone (Rot) or DMSO treatment in the presence or absence of 0.1 mM exogenous asparagine (N).

(C) Relative proliferation rate of indicated cell lines with metformin (Met) or vehicle control (PBS) treatment in the presence or absence of 0.1 mM exogenous asparagine (N).

(D) Relative HeLa cell proliferation rate with rotenone or DMSO treatment in the presence or absence of 0.1 mM exogenous asparagine (N) or 20 mM aspartate.

(E) Relative HeLa cell proliferation rate with IACS-010759 (IACS) or vehicle control (DMSO) treatment in the presence of varying concentrations of asparagine (N).

(F) Relative HCC70 cell proliferation rate with metformin (Met) or vehicle control (PBS) treatment in the presence of varying concentrations of asparagine (N).

(G) Relative proliferation rate of indicated cell lines with DMSO or antimycin A (Ant). Experiments were performed in the presence of 50 ug/ml uridine.

(H) Relative HeLa cell proliferation rate with DMSO or antimycin A (Ant) in the presence or absence of 50 ug/ml uridine.

(I) Relative proliferation rate of indicated cell lines with rotenone (Rot) or DMSO treatment in standard pyruvate-free DMEM in the presence or absence of 0.1 mM exogenous asparagine (N).

(J) Relative proliferation rate of indicated cell lines with metformin (Met) or PBS treatment in standard pyruvate-free DMEM in the presence or absence of 0.1 mM exogenous asparagine (N).

(K) Relative proliferation rate of indicated cell lines with metformin or PBS treatment in pyruvate-free DMEM supplemented with 0.4 mM proline, 0.5 mM alanine, 0.1 mM glutamate, and 0.15 mM taurine in the presence or absence of 0.1 mM exogenous asparagine (N).

(L-M) Relative levels of intracellular proline (L) and taurine (M) in the indicated cell line 6 hours post-treatment with rotenone or DMSO in standard pyruvate-free DMEM in the presence or absence of 0.1 mM exogenous asparagine (N). Data are mean +/- s.d. (n = 3 independent experiments). P value determined by unpaired two-tailed t-test: \*p<0.05; \*\*p<0.01; \*\*\*p<0.001; ns, not significant.

Figure S2

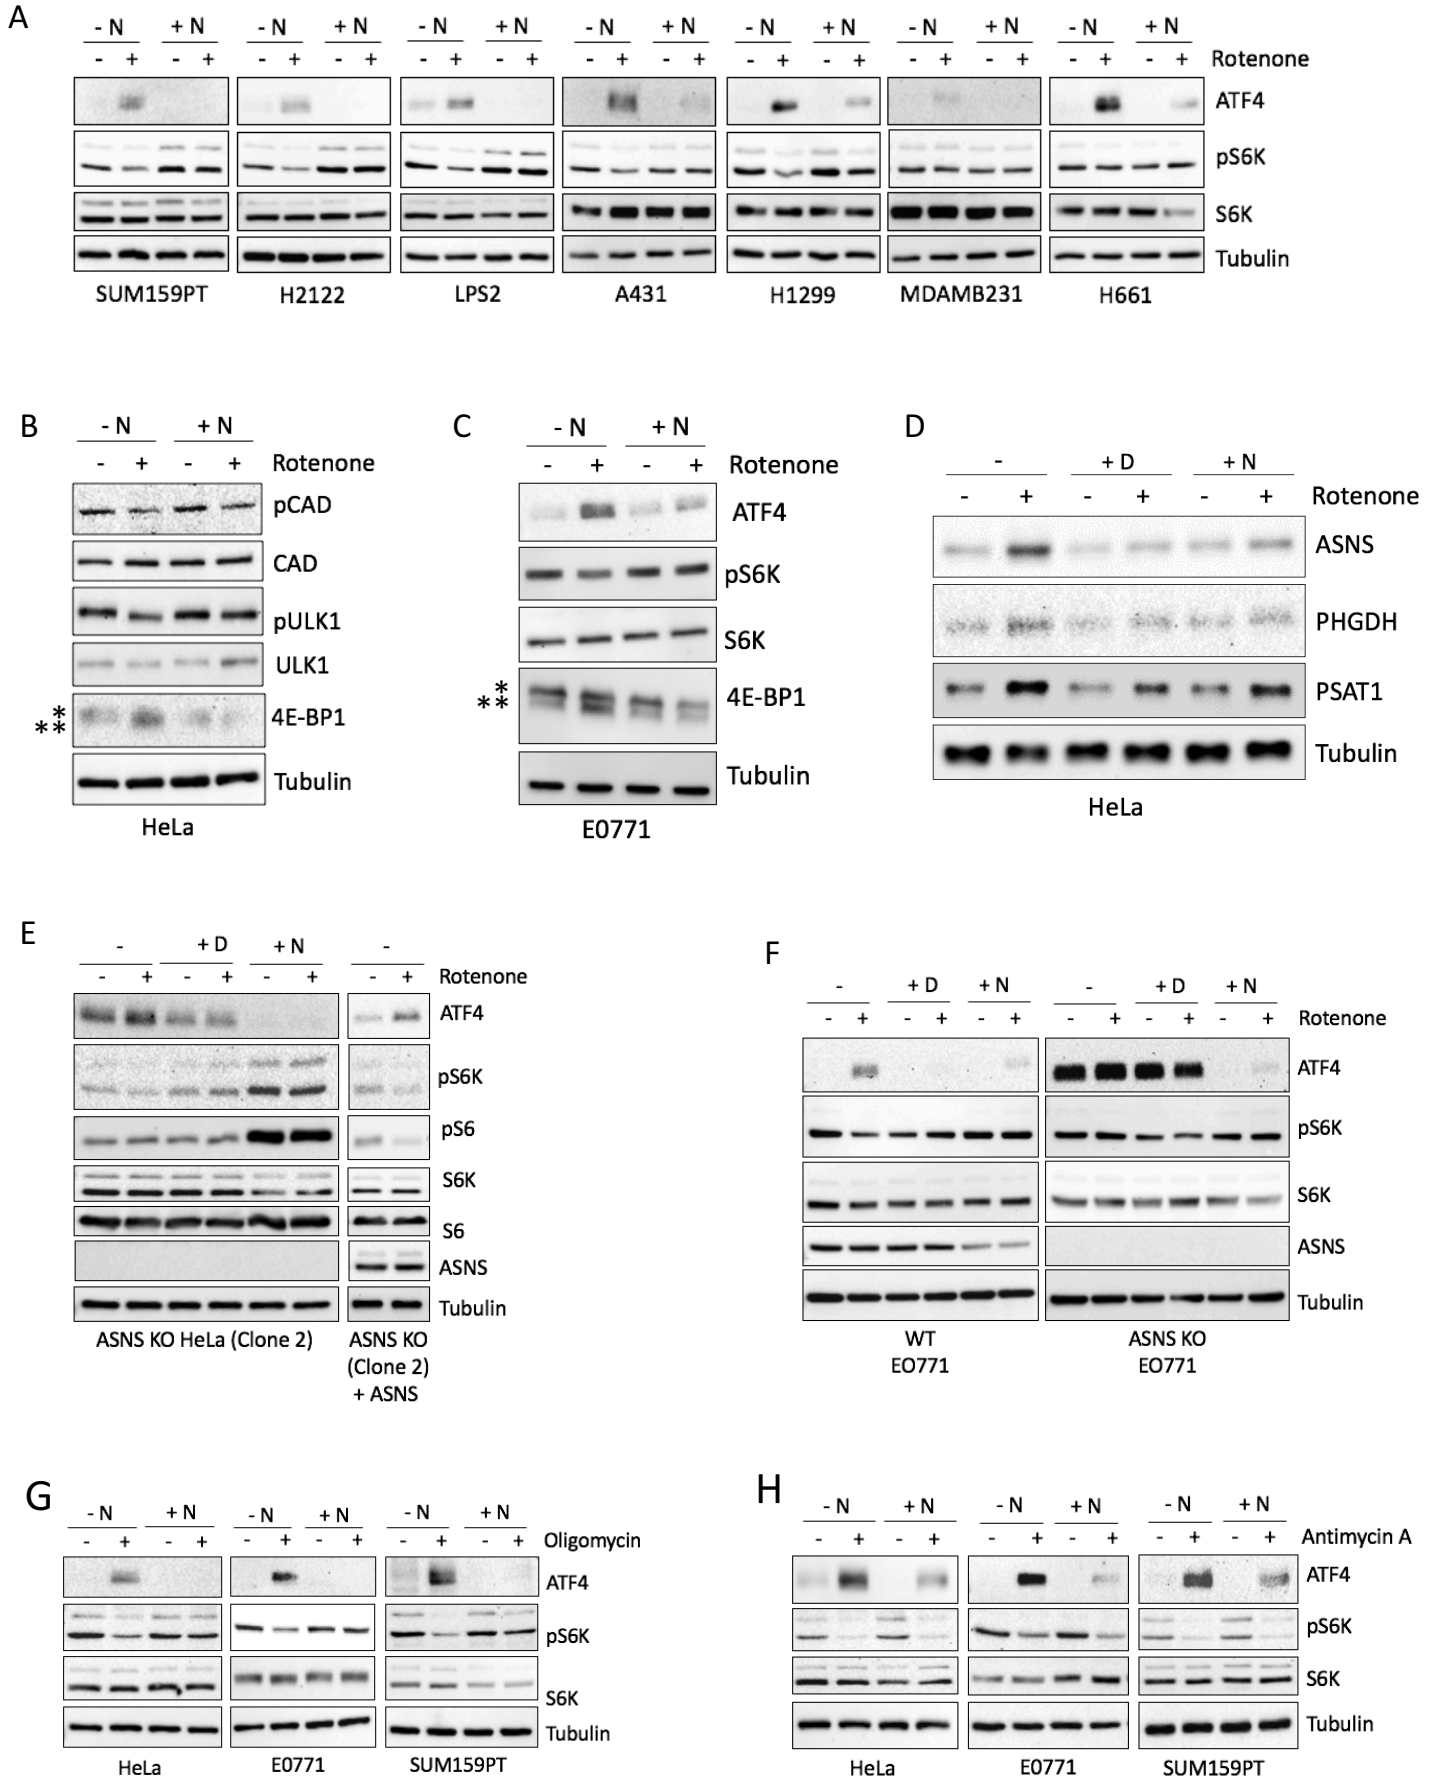

**Figure S2. Asparagine restores ATF4 and mTORC1 activities with ETC inhibition. Related to Figure 3.**

(A) Immunoblot of lysates 6 hours post-rotenone (rot) (50 nM) or DMSO treatment. Lysates were immunoblotted for ATF4, mTORC1 activation marker phospho-Thr389 S6K, total S6K, and tubulin.

(B) Immunoblot of HeLa cell lysates 6 hours post-rotenone (rot) (50 nM) or DMSO treatment. Lysates were immunoblotted for phospho-CAD (Ser1859), total CAD, phospho-ULK1 (Ser757), total ULK1, 4E-BP1 (\*phosphorylated; \*\*unphosphorylated), and tubulin.

(C) Immunoblot of E0771 cell lysates 6 hours post-rotenone (rot) (50 nM) or DMSO treatment. Lysates were immunoblotted for ATF4, phospho-Thr389 S6K, total S6K, 4E-BP1 (\*phosphorylated; \*\*unphosphorylated), and tubulin.

(D) Immunoblot of HeLa cell lysate 48 hours post-rotenone (50 nM) treatment in the presence or absence of 20 mM aspartate (D) or 0.1 mM asparagine (N). Lysates were immunoblotted for ATF4 target genes ASNS, PHGDH, and PSAT1, as well as tubulin.

(E) Left, Immunoblot of HeLa ASNS KO (clone 2; see Figure 3C for ASNS KO clone 1) lysates 6 hours post-treatment with 50 nM rotenone or DMSO in the presence or absence of 20 mM aspartate (D) or 0.1 mM asparagine (N); Right, ASNS was restored in HeLa ASNS KO cells with CMV-driven ectopic expression.

Immunoblot shows lysates 6 hours post-treatment with 50 nM rotenone or DMSO in unsupplemented DMEM.

(F) Immunoblot of E0771 WT or ASNS KO lysates 3 hours post-treatment with 50 nM rotenone or DMSO in the presence or absence of 0.1 mM asparagine (N) or 20 mM aspartate (D).

(G-H) Immunoblot of HeLa, E0771, and SUM159PT cell lysate 6 hours post treatment with oligomycin (G) or antimycin A (H) at concentrations listed in Supplementary Table I and in the presence or absence of 0.1 mM asparagine.

Figure S3

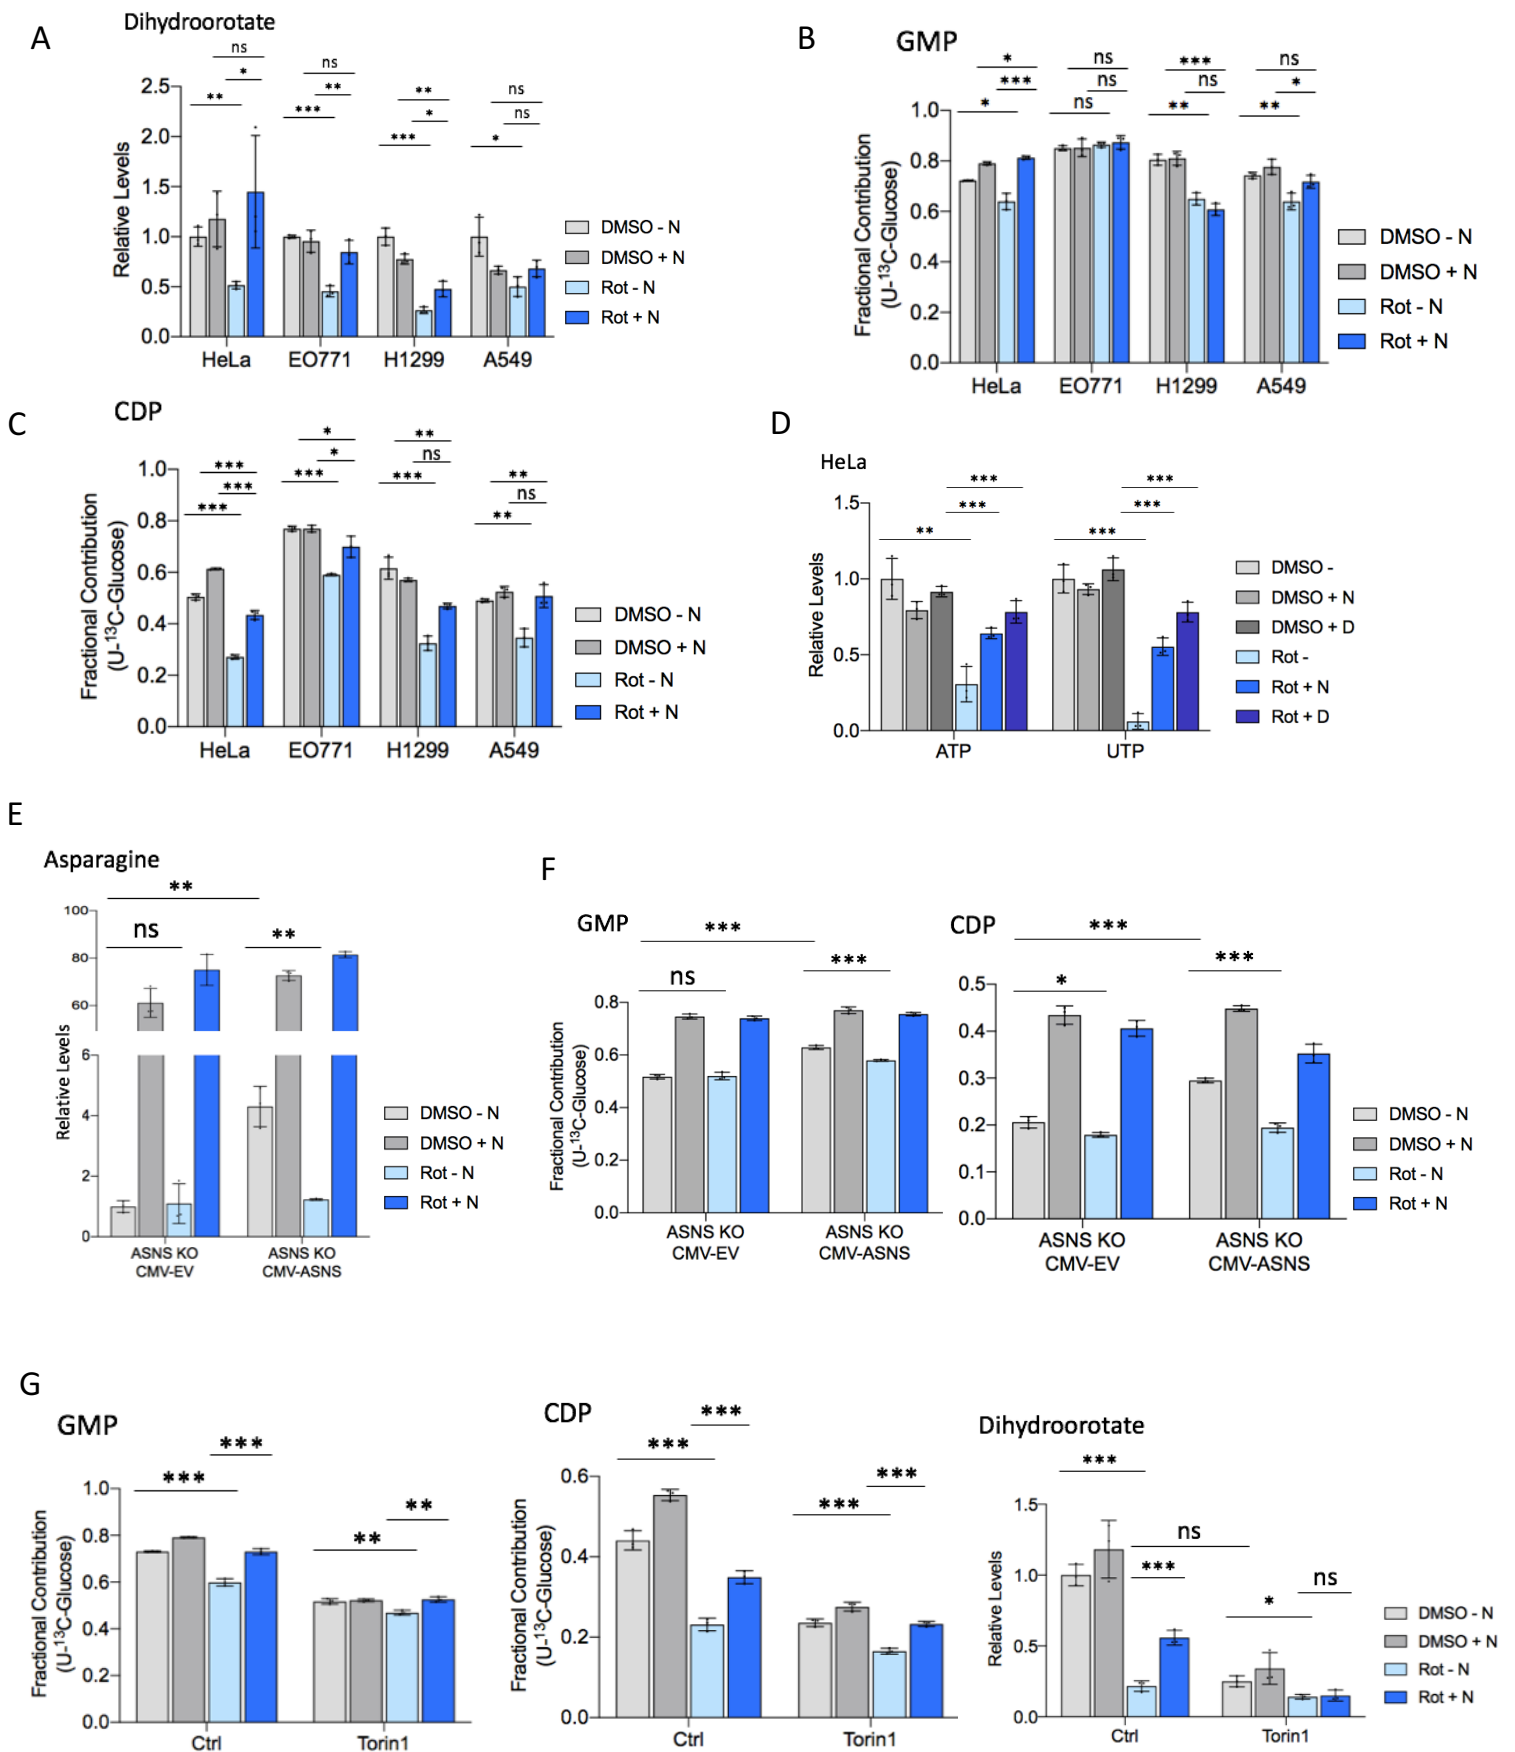

**Figure S3. Asparagine restores nucleotide synthesis in context of ETC inhibition. Related to Figure 4.**

(A) Relative levels of pyrimidine precursor dihydroorotate in the indicated cell line 6 hours post-treatment with rotenone or DMSO presence or absence of 0.1 mM exogenous asparagine.

(B-C) Fractional contribution of U-13C-glucose to GMP (B) and CDP (C) in the indicated cell line 6 hours post-treatment with rotenone or DMSO presence or absence of 0.1 mM exogenous asparagine. Medium was replaced with DMEM containing 10 mM U-13C-glucose at the same time as rotenone treatment.

(D) Relative levels of intracellular ATP and UTP in HeLa cells 48 hours post-treatment with 50 nM rotenone or DMSO in the presence or absence of 0.1 mM asparagine (N) or 20 mM aspartate (D).

(E) Relative levels of asparagine in ASNS knockout HeLa cells stably expressing ASNS (CMV-ASNS) or empty vector (CMV-EV) 6 hours post-treatment with rotenone or DMSO presence or absence of 0.1 mM exogenous asparagine, as in B-C.

(F) Fractional contribution of U-13C-glucose to GMP and CDP in ASNS knockout HeLa cells stably expressing ASNS (CMV-ASNS) or empty vector (CMV-EV) 6 hours post-treatment with rotenone or DMSO presence or absence of 0.1 mM exogenous asparagine, as in B-C.

(G) Fractional contribution of U-13C-glucose to GMP and CDP and relative levels of dihydroorotate in HeLa cells 6 hours post-treatment with rotenone or DMSO in the presence or absence of 0.1 mM exogenous asparagine and in the presence of DMSO (Ctrl) or 250 nM Torin1, as in B-C. Data are mean  $\pm$  s.d. (n = 3 independent experiments). P value determined by unpaired two-tailed t-test: \*p<0.05; \*\*p<0.01; \*\*\*p<0.001; ns, not significant.

## Figure S4

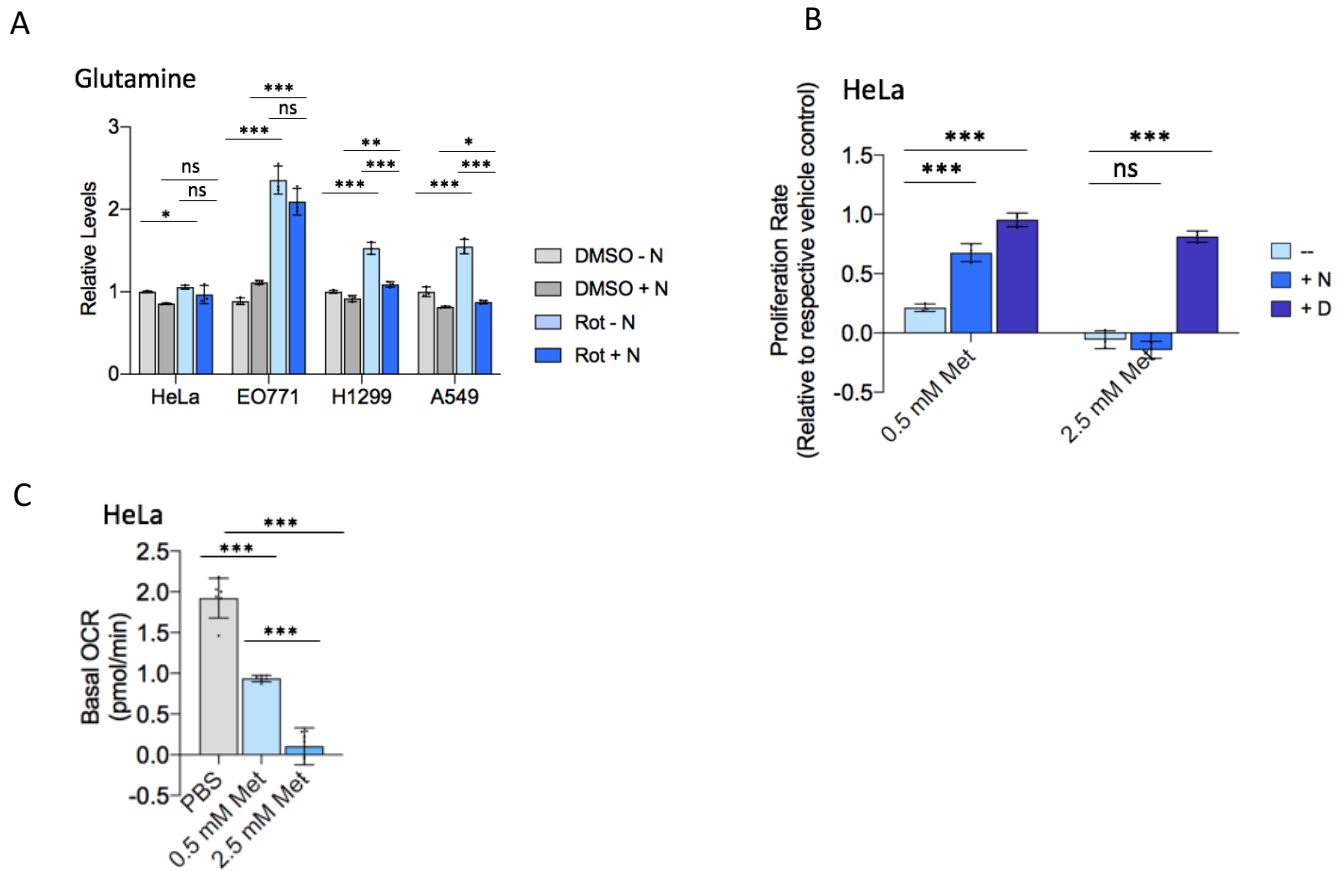

**Figure S4. Asparagine versus aspartate auxotrophy with ETC inhibition reflects degree of respiration impairment. Related to Figure 4.**

(A) Relative levels of intracellular glutamine in the indicated cell line 6 hours post-treatment with rotenone or DMSO presence or absence of 0.1 mM exogenous asparagine (N).

(B) HeLa cell proliferation rate with either 0.5 or 2.5 mM metformin (Met) treatment in the presence or absence of 0.1 mM exogenous asparagine (N) or 20 mM aspartate, relative to PBS control proliferation in unsupplemented DMEM.

(C) HeLa cell oxygen consumption rate (OCR) 6 hours post-treatment with PBS, 0.5, or 2.5 mM metformin.

Data are mean  $\pm$  s.d. ( $n = 3$  independent experiments). P value determined by unpaired two-tailed t-test:

\* $p < 0.05$ ; \*\* $p < 0.01$ ; \*\*\* $p < 0.001$ ; ns, not significant.

Figure S5

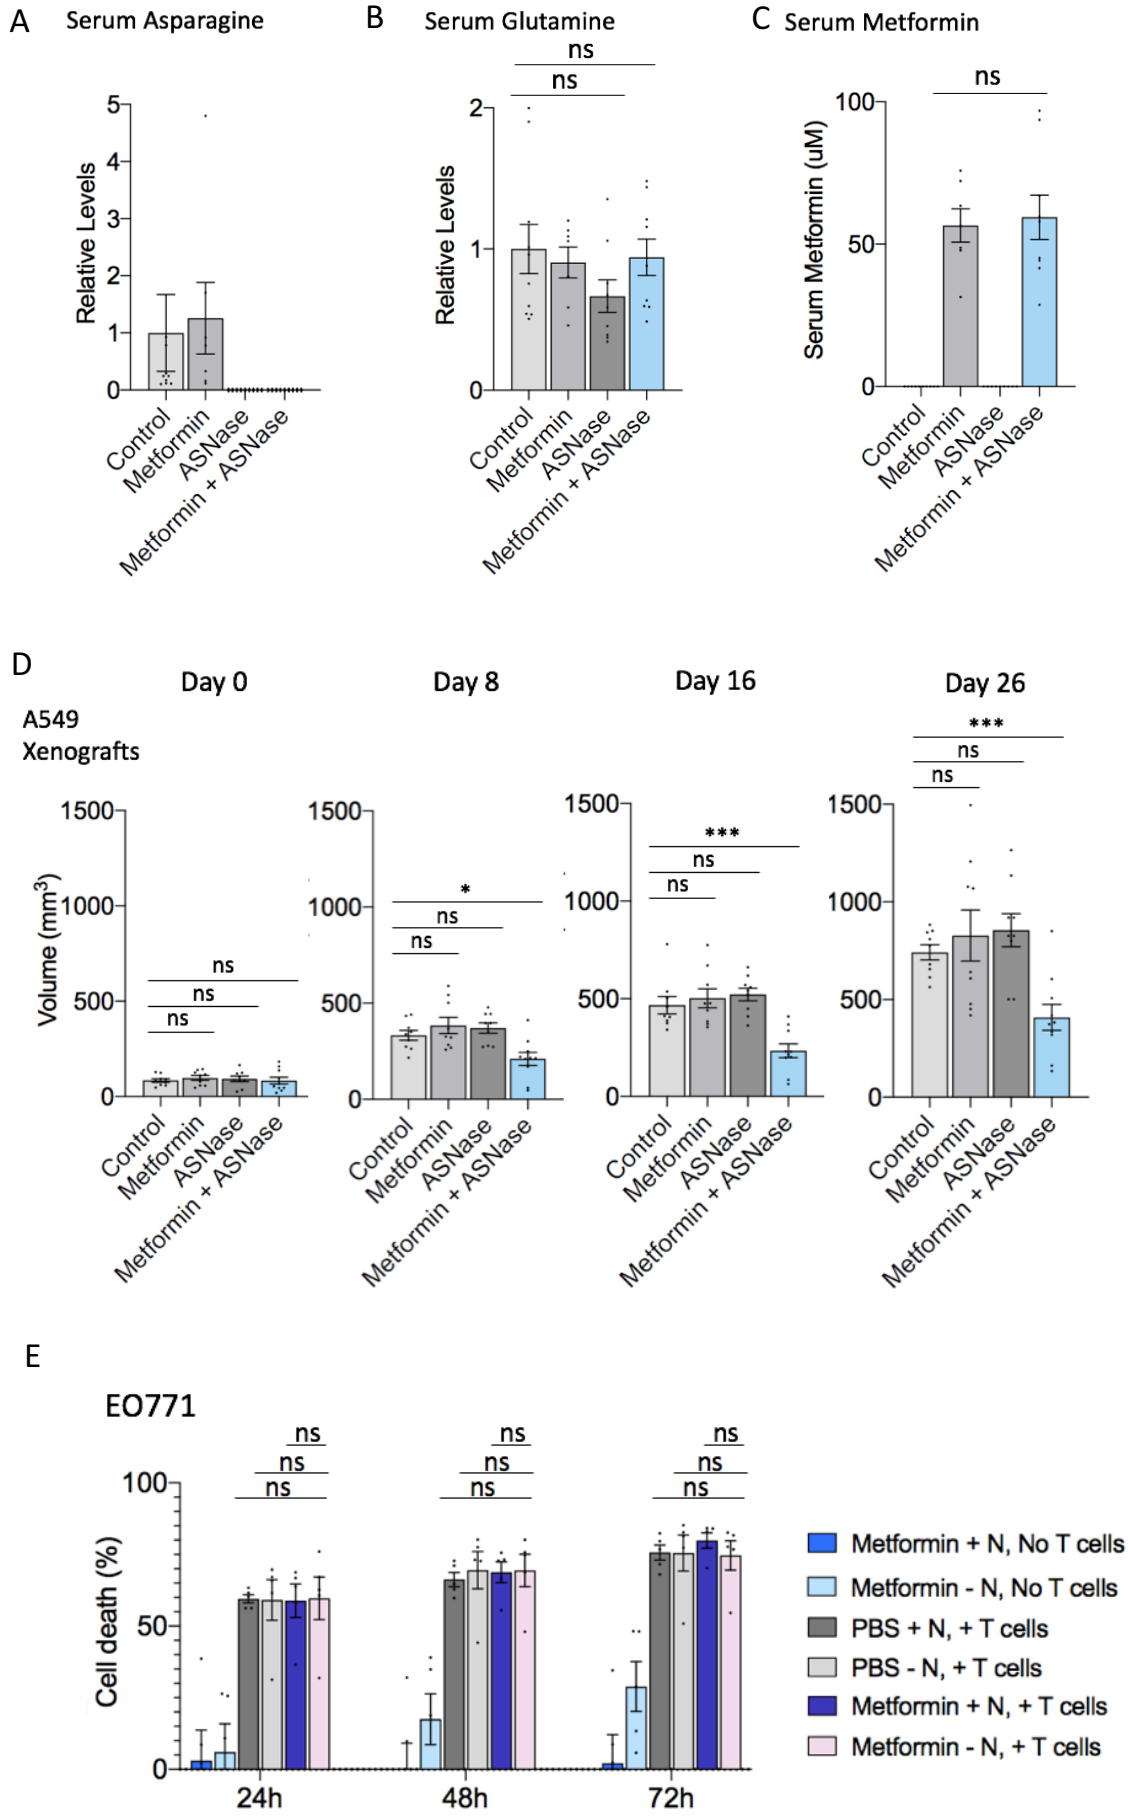



**Figure S5. Combining metformin with asparaginase inhibits tumor growth. Related to Figure 5.**

(A-C) Serum asparagine (A), glutamine (B) and metformin (C) levels from mice treated with metformin, asparaginase (ASNase), the combination, or vehicle controls. n = 7-10.

(D) Tumor volume (mm<sup>3</sup>) of A549 subcutaneous tumor xenografts at days 0, 8, 16, and 26 post-initiation of treatment with metformin (250 mg/kg/day), asparaginase (ASNase) (5 IU/kg), the combination, or vehicle controls as determined by caliper measurements. n = 9-10.

(E) Cell death of E0771 cells with metformin treatment in the presence of absence of 0.1 mM exogenous asparagine (N) and in the presence (grey and purple bars) or absence (blue bars) of OT1 T cells, n = 5.

Data are mean +/- s.e.; P value determined by unpaired two-tailed t-test: \*p<0.05; \*\*p<0.01; \*\*\*p<0.001; ns, not significant.

# Figure S6

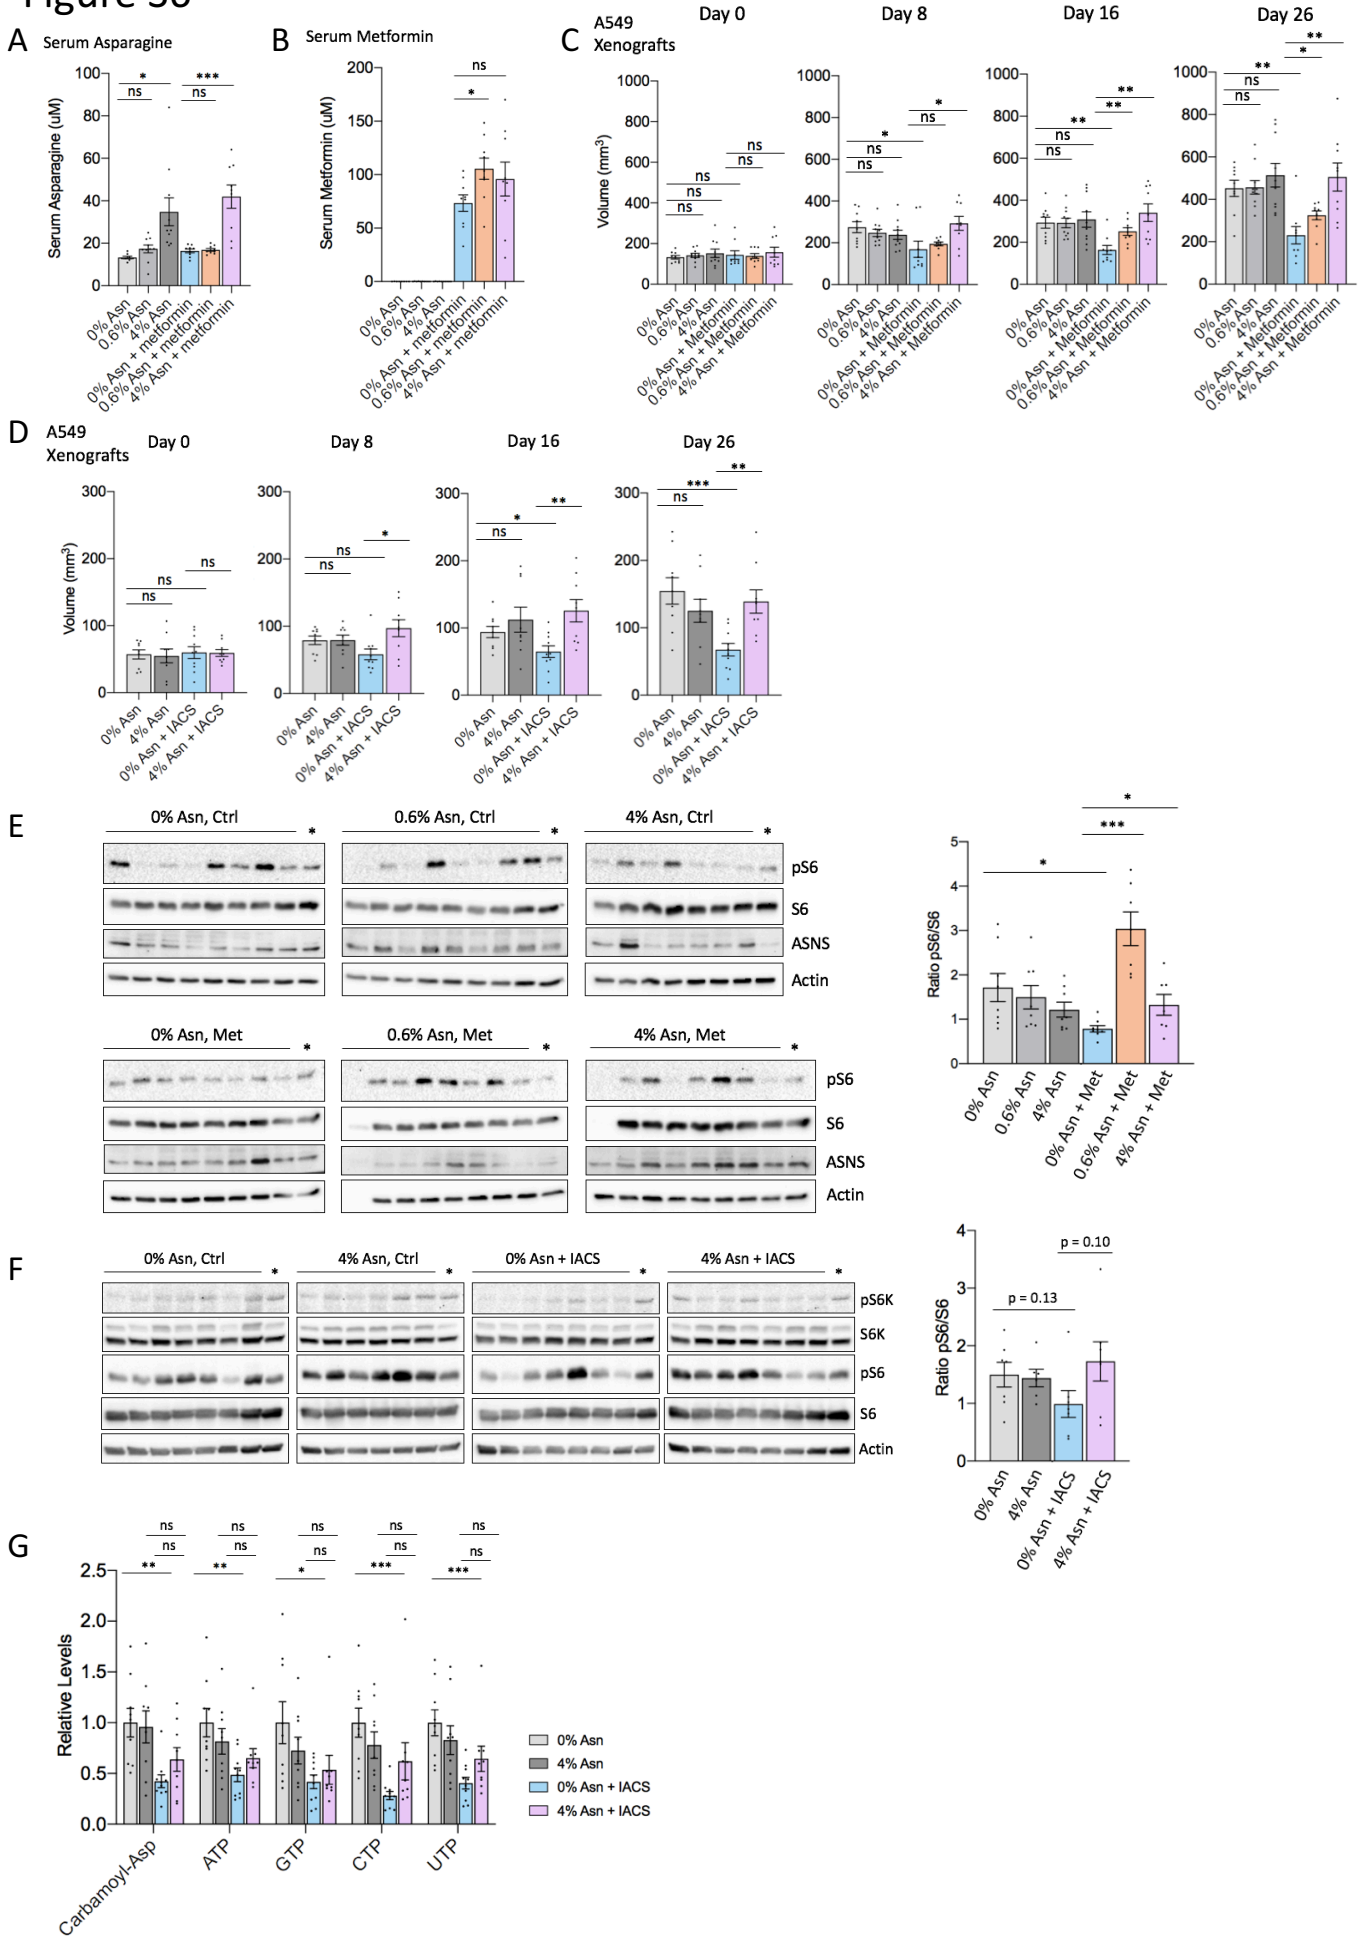

**Figure S6. Combining metformin with dietary asparagine restriction inhibits tumor growth. Related to Figure 6.**

(A-B) Serum asparagine (A) and metformin (B) levels from mice treated with or without metformin and diets containing 0%, 0.6%, or 4% asparagine (Asn).

(C) Tumor volume (mm<sup>3</sup>) of A549 subcutaneous tumor xenografts at days 0, 8, 16, and 26 post-initiation of treatment with or without metformin and diets containing 0%, 0.6%, or 4% asparagine (Asn).

(D) Tumor volume (mm<sup>3</sup>) of A549 subcutaneous tumor xenografts at days 0, 8, 16, and 26 post-initiation of treatment with or without IACS-010759 (IACS) and diets containing 0% or 4% asparagine (Asn).

(E) Immunoblot of A549 tumor lysates from mice treated with or without metformin and fed a diet containing 0%, 0.6%, or 4% asparagine. Each lane contained lysate from individual tumors within each treatment group. Lysates were immunoblotted for mTORC1 activation marker phospho-Ser235/6 S6, total S6, ASNS, and actin. The asterisk (\*) indicates a reference lysate (taken from the largest of the “4% Asn, Ctrl” group) that was run on each gel. Quantification is shown to the right.

(F) Immunoblot of A549 tumor lysates from mice treated with or without IACS-010759 (IACS) and fed a diet containing 0% or 4% asparagine. Each lane contained lysate from individual tumors within each treatment group. Lysates were immunoblotted for mTORC1 activation marker phospho-Ser235/6 S6, total S6, ASNS, and actin. The asterisk (\*) indicates a reference lysate (taken from the largest of the “4% Asn, Ctrl” group) that was run on each gel. Quantification is shown to the right

(G) Relative levels of tumor carbamoyl-aspartate and nucleotides at endpoint from mice with or without IACS-010759 (IACS) and fed a diet containing 0% or 4% asparagine. For (A-D) and (G), data are mean +/- s.e.

\*p<0.05; \*\*p<0.01; \*\*\*p<0.001; ns, not significant.

Figure S7

A

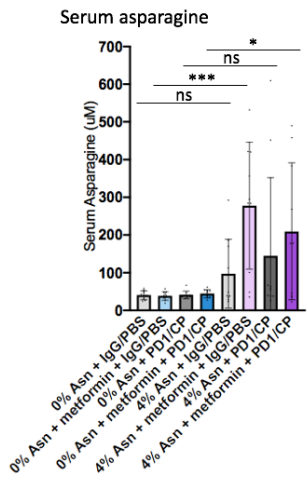

B

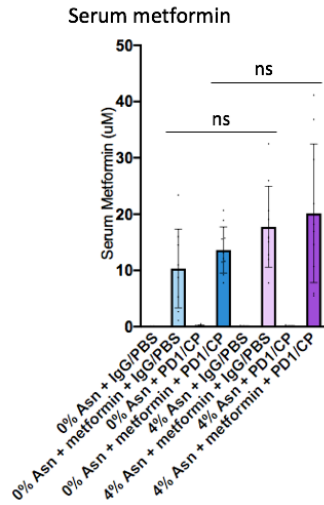

C

EO771 Syngeneic

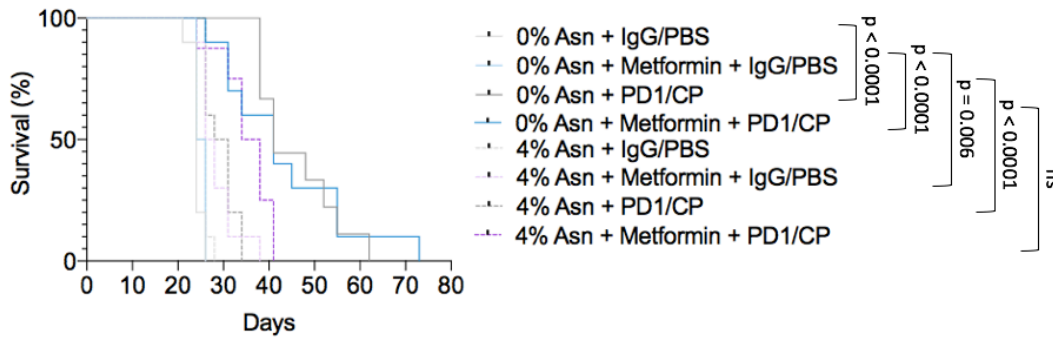

D

EO771 Syngeneic

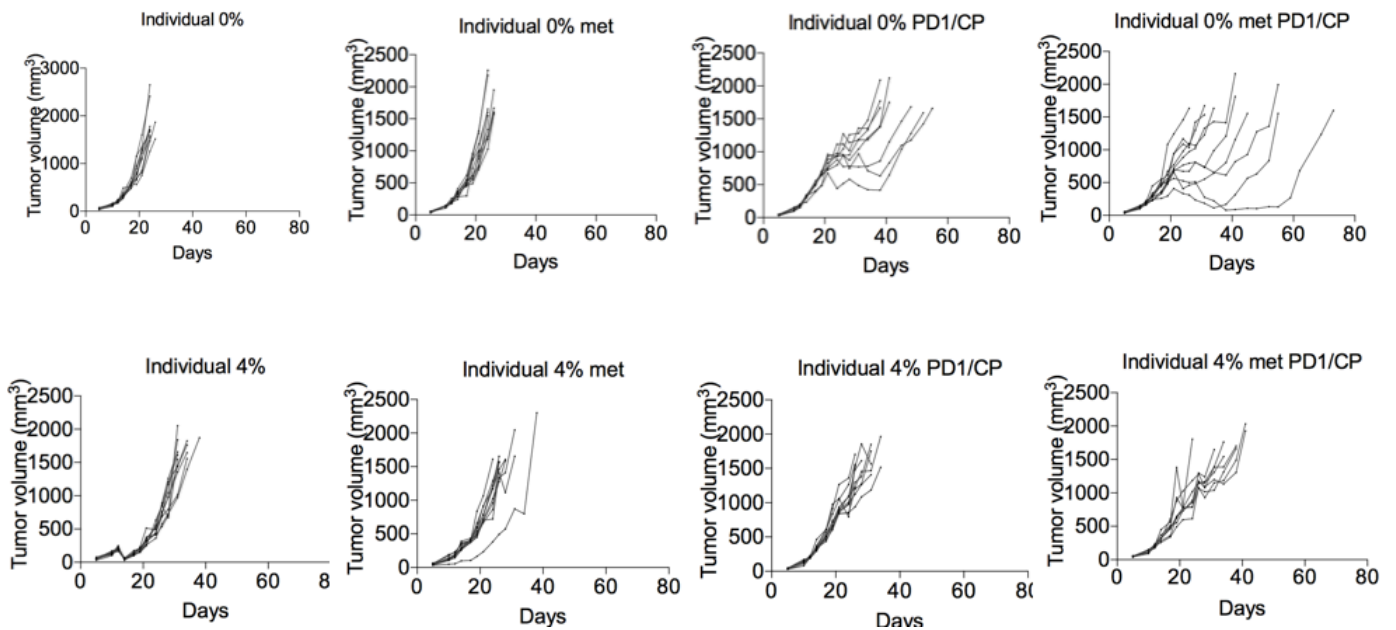

**Figure S7. Dietary asparagine restriction synergizes with PD1 inhibition and chemotherapy. Related to Figure 6.**

(A-B) Endpoint serum asparagine (A) and metformin (B) from mice harboring syngeneic E0771 mammary tumors and treated with or without metformin and/or a combination of inhibitory PD1 antibody and cyclophosphamide (CP) and fed a diet containing 0% or 4% asparagine (Asn), n = 10.

(C) Kaplan-Meier survival curve indicating percentage of mice with syngeneic E0771 mammary tumors surviving with the indicated treatments, n = 10.

(D) Individual tumor growth curves of E0771 tumors with the indicated treatment. For (A-B) data are mean +/- s.e. For (C), P-value was calculated by Mantel-Cox test. \*p<0.05; \*\*p<0.01; \*\*\*p<0.001; ns, not significant.

**Table S1: Cell line-specific conditions for ETC inhibition. Related to Figure 1.**

| Cell line                  | Serum*           | Added AAs Required | Metformin (mM) | Rotenone (nM) | IACS-010759 (nM) | Antimycin A (nM) | Oligomycin (nM) |
|----------------------------|------------------|--------------------|----------------|---------------|------------------|------------------|-----------------|
| HeLa                       | Dialyzed FBS     | -                  | 0.5            | 50            | 25               | 25               | 100             |
| EO771                      | Dialyzed FBS     | -                  | 5              | 50            | 50               | 25               | 100             |
| SUM159PT                   | Non-dialyzed FBS | -                  | 1              | 50            | 10               | 250              | 100             |
| MDAMB231                   | Dialyzed FBS     | -                  | 2.5            | 50            |                  |                  |                 |
| H2122                      | Dialyzed FBS     | -                  | 0.5            | 50            |                  |                  |                 |
| LPS2                       | Dialyzed FBS     | -                  | 0.1            | 50            |                  |                  |                 |
| HCC70                      | Dialyzed FBS     | -                  | 2.5            |               |                  |                  |                 |
| A431                       | Dialyzed FBS     | -                  |                | 50            |                  |                  |                 |
| A549                       | Dialyzed FBS     | Pro, Ala, Glu, Tau | 0.5            | 10            |                  |                  |                 |
| H1299                      | Dialyzed FBS     | Pro, Ala, Glu, Tau | 1              | 50            |                  |                  |                 |
| MCF10A                     | Non-dialyzed HS  | -                  |                | 50            |                  |                  |                 |
| H661                       | Dialyzed FBS     | -                  | 2.5            | 50            |                  |                  |                 |
| HeLa ATF4 KO & CRISPR Ctrl | Non-dialyzed FBS | -                  |                | 25            |                  |                  |                 |

\* Dialyzed FBS was used to eliminate asparagine from the culture medium except in cell lines that do not proliferate with dialyzed FBS.
